# Supplementary material for: A single probe for sensing both acetate and aluminum(iii): visible region detection, red fluorescence and human breast cancer cell imaging
Source: Royal Society of Chemistry journal article supplement (doi:10.1039/c4ra16768f), 2015-01-01
Supplement: c4ra16768f1.pdf [file c4ra16768f1.pdf]

## Electronic supporting information (ESI)

### A single probe for sensing both acetate and aluminum(III): Visible region detection, red fluorescence and human breast cancer cell imaging

Abhijit Ghosh<sup>a</sup>, Archya Sengupta<sup>b</sup>, Ansuman Chattopadhyay<sup>b</sup> and Debasis Das<sup>a\*</sup>

<sup>a</sup>Department of Chemistry, The University of Burdwan, Golapbag, Burdwan, India, Fax: +91-342-2530452; Tel: +91-342-2533913 (ext. 424); E-mail: [ddas100in@yahoo.com](mailto:ddas100in@yahoo.com)

<sup>b</sup>Department of Zoology, VisvaBharati University, Santiniketan, West Bengal, India

#### 1. General method of UV-Vis and fluorescence titration

Path length of the cells used for absorption and emission studies is 1 cm. Stock solutions of **L** and AcO<sup>-</sup> are prepared in DMSO while for Al<sup>3+</sup> work, stock solutions of **L** and Al<sup>3+</sup> are prepared in CH<sub>3</sub>OH/ water (4/1, v/v). Working solutions of **L**, Al<sup>3+</sup> and AcO<sup>-</sup> are prepared from their respective stock solutions. Fluorescence measurements are performed using 10 nm x 5 nm slit width for AcO<sup>-</sup> and 2.5 nm x 2.5 nm slit width for Al<sup>3+</sup> work.

#### 2. Job's plot from fluorescence experiments

A series of solutions containing **L**, Al<sup>3+</sup> and AcO<sup>-</sup> in respective solvents are prepared such that the total concentration of Al<sup>3+</sup>+**L** or **L** + AcO<sup>-</sup> remain constant (50 μM) in all the sets. The mole fraction (X) of **L** is varied from 0.1 to 0.8. The fluorescence intensities are plotted against the mole fraction of **L**.

#### 3. Determination of binding constant

The binding constant of **L** for Al<sup>3+</sup> and AcO<sup>-</sup> are determined using modified Benesi–Hildebrand equation<sup>1</sup>:  $(F_{\max} - F_{\min})/(F_x - F_{\min}) = 1 + (1/K) (1/[C]^n)$  where  $F_{\max}$ ,  $F_{\min}$  and  $F_x$  are emission

intensity values for **L** in the presence of  $\text{Al}^{3+}$  or  $\text{AcO}^-$  at saturation, in the absence of  $\text{Al}^{3+}/\text{AcO}^-$  and at any intermediate  $\text{Al}^{3+}/\text{AcO}^-$  concentration, respectively. A plot of  $(F_{\max} - F_{\min})/(F_x - F_{\min}) = 1 + (1/K) (1/[C]^n)$  (here  $n = 1$ , for both cases) allows to calculate the binding constant from the slope.

#### 4. Determination of quantum yield

Fluorescence quantum yields ( $\Phi$ ) are estimated by integrating the area under the fluorescence

curves using the equation,

$$\Phi_{\text{sample}} = \frac{OD_{\text{standard}} \times A_{\text{sample}}}{OD_{\text{sample}} \times A_{\text{standard}}} \times \Phi_{\text{standard}} \times \frac{\eta_{\text{sample}}^2}{\eta_{\text{standard}}^2}$$

where  $A$  is the area under the fluorescence spectra and  $OD$  is optical density of the compound at the excitation wavelength.<sup>2</sup> The area of the emission spectrum is integrated using the software available in the instrument.  $\Phi_{\text{sample}}$  and  $\Phi_{\text{ref}}$  are the fluorescence quantum yields of the sample and reference respectively.  $A_{\text{sample}}$  and  $A_{\text{ref}}$  are the area under the fluorescence spectra of the sample and the reference, respectively.  $OD_{\text{sample}}$  and  $OD_{\text{ref}}$  are the corresponding optical densities of the sample and the reference solution at the wavelength of excitation.  $\eta_{\text{sample}}$  and  $\eta_{\text{ref}}$  are the refractive indices of the sample and reference, respectively. Anthracene is used as reference with a known  $\Phi_{\text{ref}}$  value of 0.27 in  $\text{EtOH}^3$  for measuring the quantum yields of ligand and its  $\text{Al}^{3+}$  complex and Rhodamine B is used as reference with a known  $\Phi_{\text{ref}}$  value of 0.65 in basic  $\text{EtOH}^4$  for measuring the quantum yields of **L** and its  $\text{AcO}^-$  adduct.

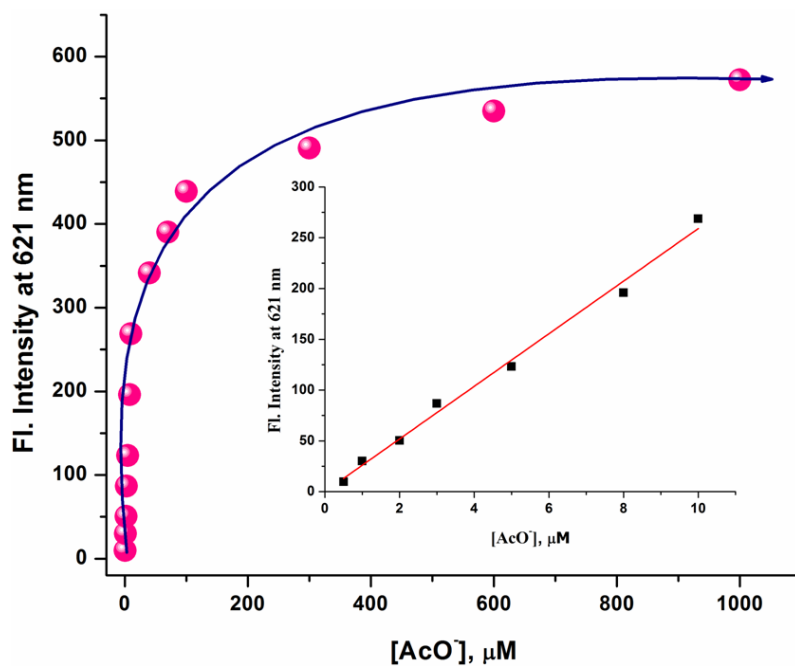

**Fig.S1.** Plot of emission intensities of **L** (10 μM,  $\lambda_{\text{ex}} = 532 \text{ nm}$ ,  $\lambda_{\text{em}} = 621 \text{ nm}$ ) as a function of externally added  $\text{AcO}^-$  (0.5-1000 μM). Inset shows the linear region (0.5-10 μM  $\text{AcO}^-$ )

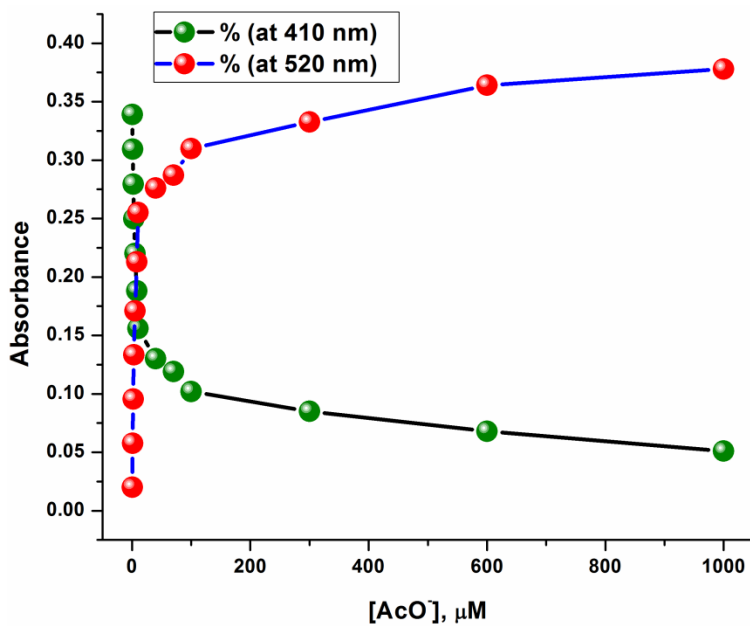

**Fig.S2.** Absorbance of **L** (10 μM) as a function of externally added  $\text{AcO}^-$  concentration (0.5-1000 μM)

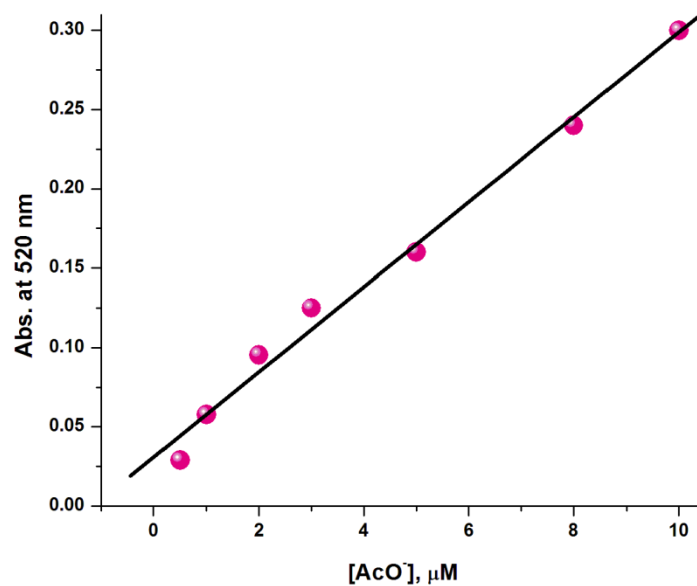

**Fig.S3.** Linear region of the plot of absorbance of L (10  $\mu\text{M}$ ,  $\lambda$ , 520 nm) as a function of externally added  $\text{AcO}^-$  concentration (0.5-10  $\mu\text{M}$ )

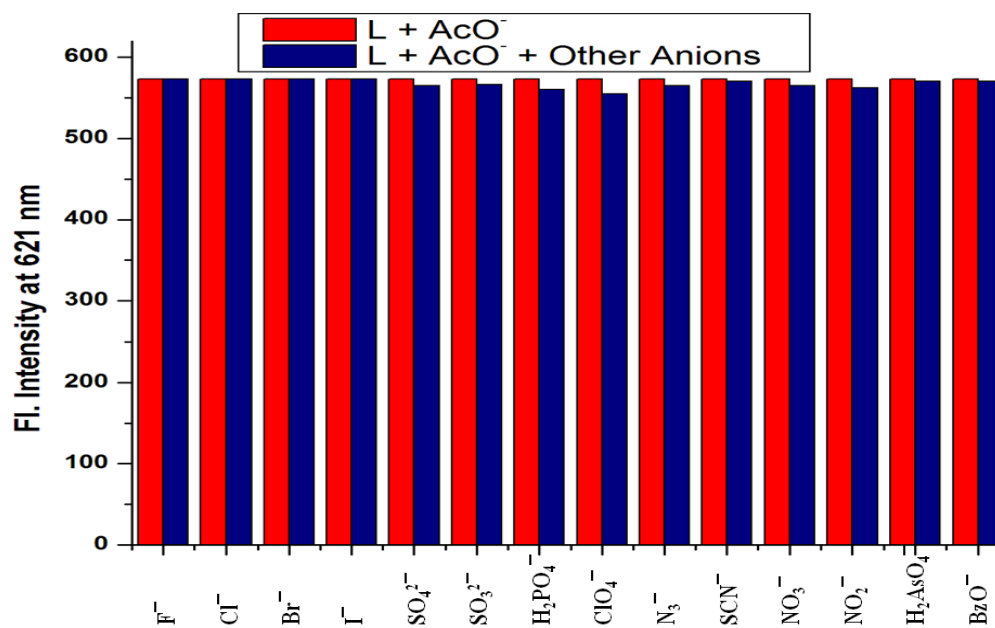

**Fig.S4.** Emission intensities of  $[\text{L} + \text{AcO}^-]$  system in presence of competing anions

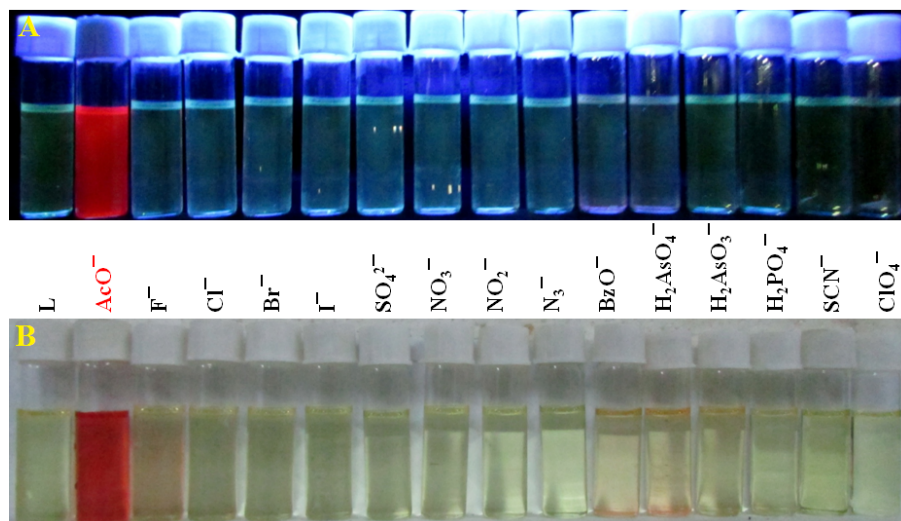

**Fig.S5.** Visual colour changes of L upon addition of equimolar amount of various cations under UV light (A) and visible light (B)

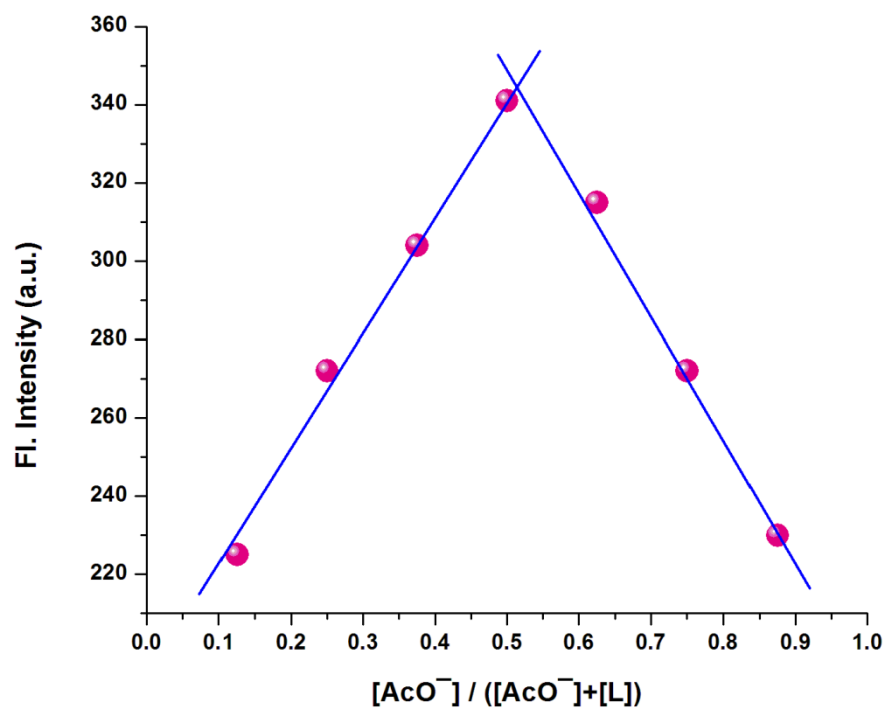

**Fig.S6.** Job's plot for determination of stoichiometry of the [L -AcO<sup>-</sup>] adduct in DMSO ( $\lambda_{\text{ex}}$ , 532 nm,  $\lambda_{\text{em}}$ , 621 nm)

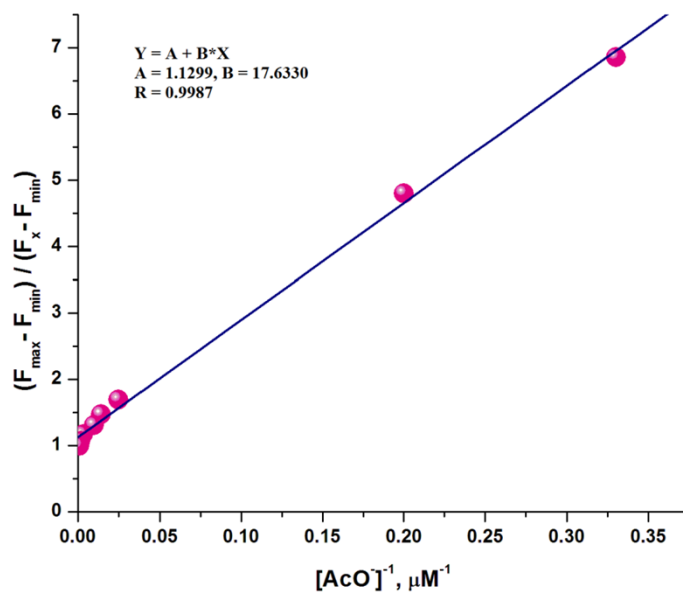

**Fig.S7.** Determination of binding constant of **L** for  $\text{AcO}^-$  in DMSO ( $\lambda_{\text{ex}}$ , 532 nm,  $\lambda_{\text{em}}$ , 621 nm) using fluorescence technique

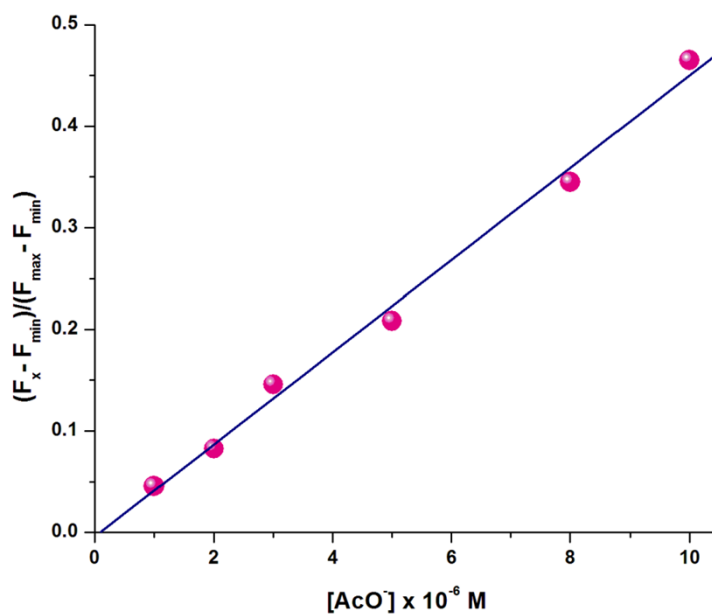

**Fig.S8.** Emission intensities of **L** (10 μM) as a function of externally added  $[\text{AcO}^-]$  in DMSO ( $\lambda_{\text{ex}}$ , 532 nm,  $\lambda_{\text{em}}$ , 621 nm) using fluorescence titration data in Fig.2

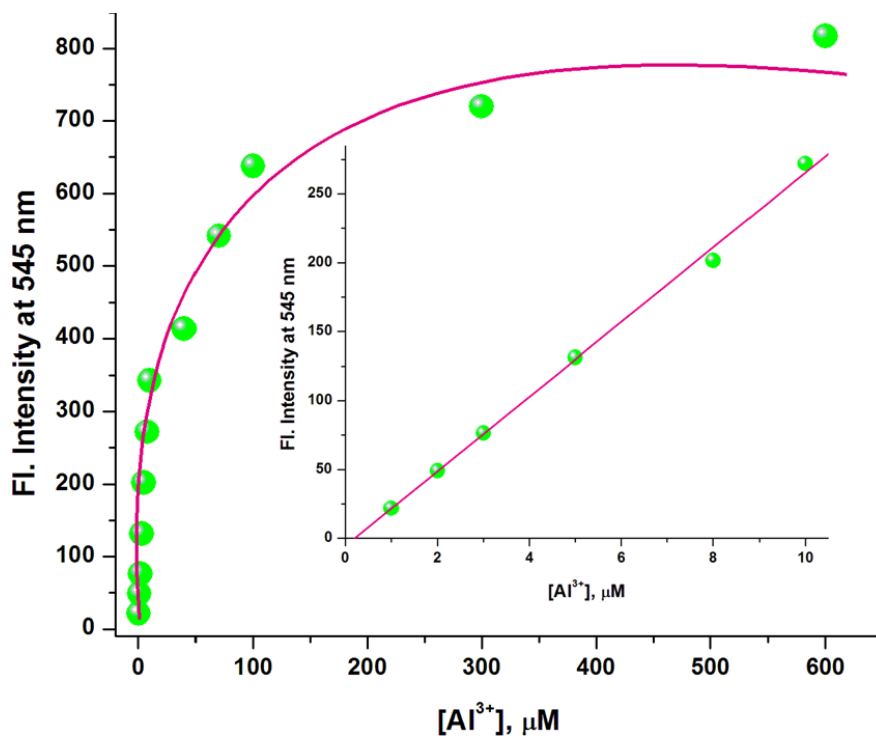

**Fig.S9.** Plot of emission intensities of **L** (15 μM,  $\lambda_{\text{ex}} = 432$  nm,  $\lambda_{\text{em}} = 545$  nm) as a function of externally added Al<sup>3+</sup> (0.5-600 μM); Inset: linear region (0.5-10 μM Al<sup>3+</sup>)

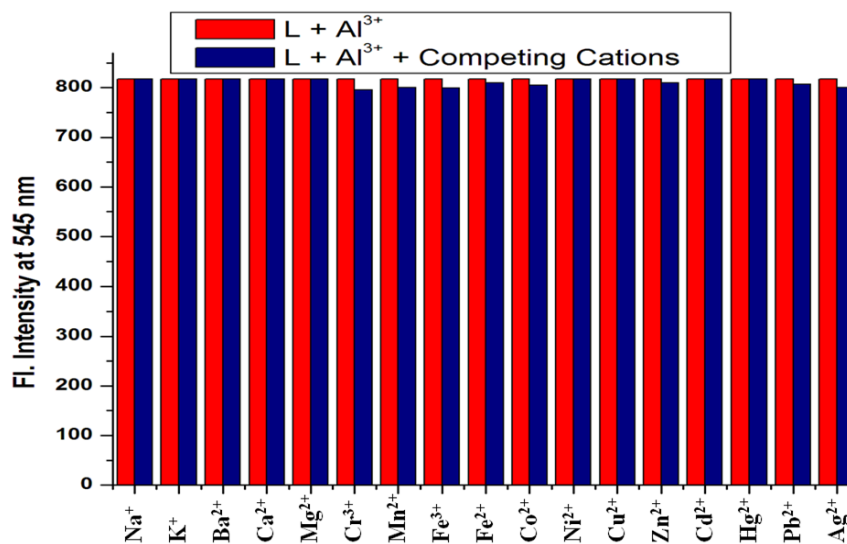

**Fig.S10.** Emission intensities of [L-Al<sup>3+</sup>] system in presence of common cations

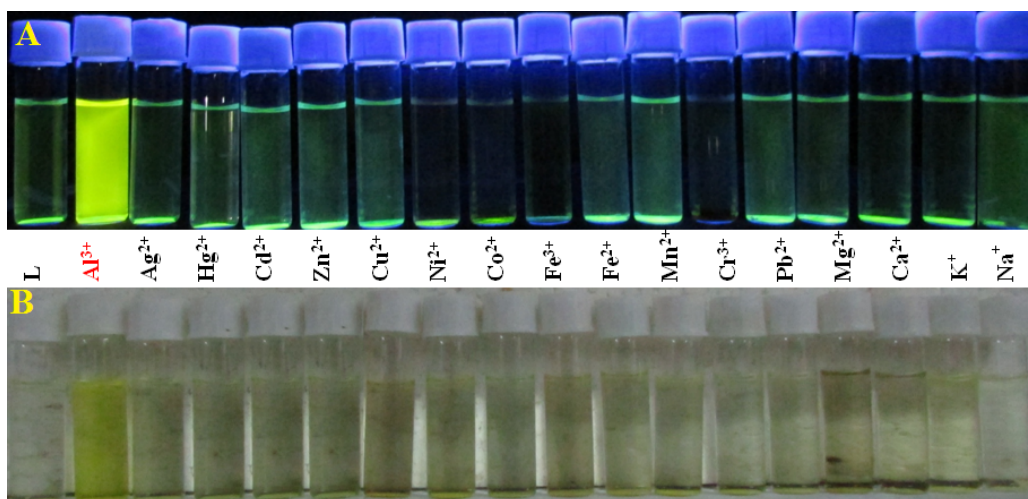

**Fig.S11.** Visual colour changes of L upon addition of equimolar amount of various cations under UV light (A) and visible light (B)

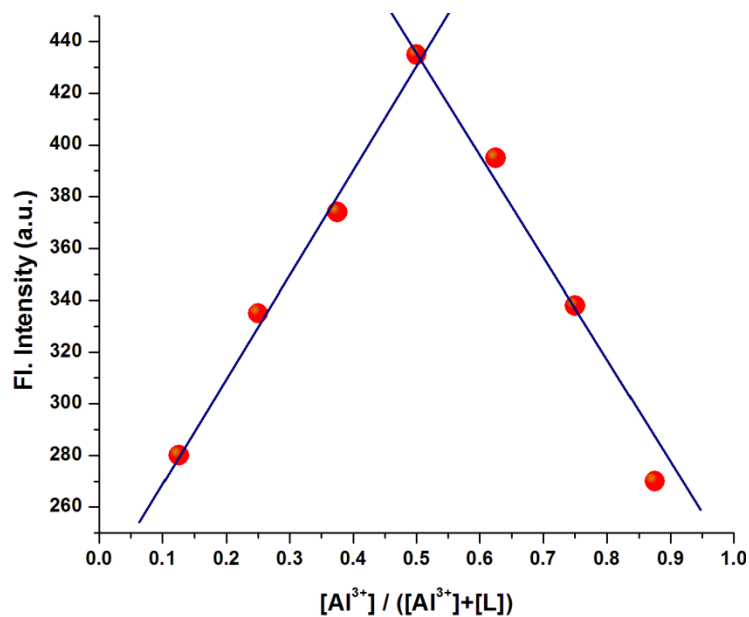

**Fig.S12.** Job's plot for determination of stoichiometry of the [L-Al<sup>3+</sup>] adduct in aqueous-methanol (1:4, v/v,  $\lambda_{ex}$ , 532 nm,  $\lambda_{em}$ , 621 nm)



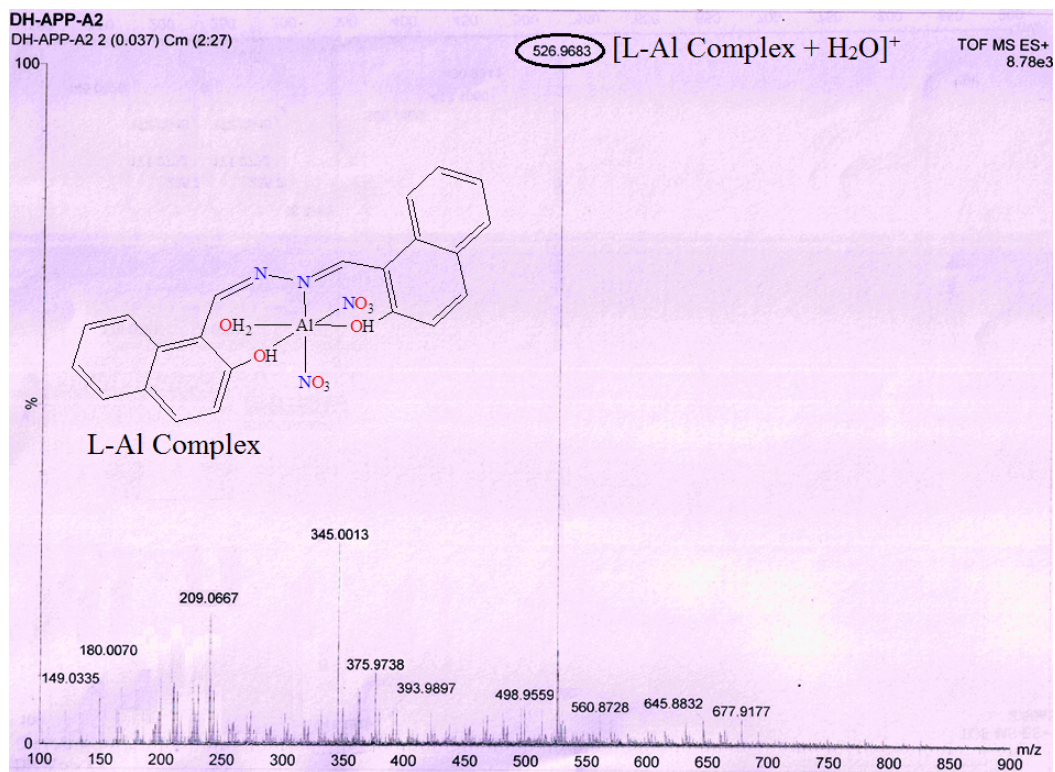

**Fig.S13.** QTOF-MS spectrum of [L- Al<sup>3+</sup>] adduct.

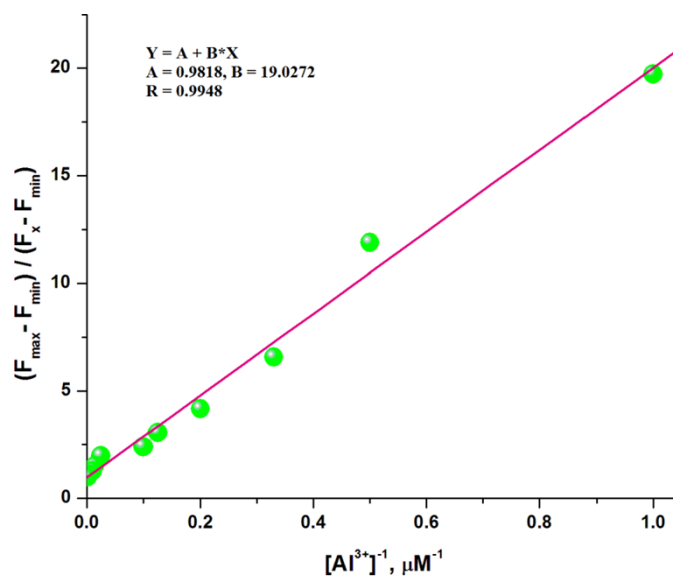

**Fig.S14.** Determination of binding constant of **L** for Al<sup>3+</sup> in aqueous-methanol (1:4, v/v, λ<sub>ex</sub>, 432 nm, λ<sub>em</sub>, 545 nm) using fluorescence technique

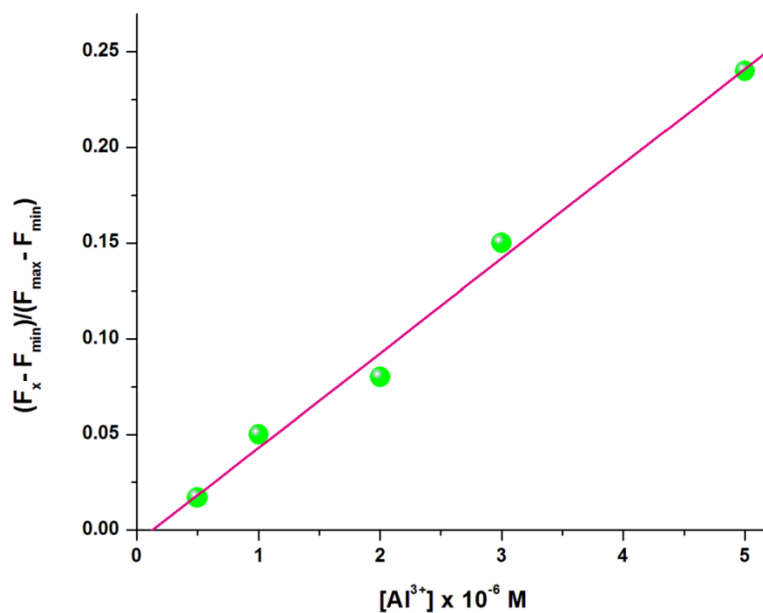

**Fig.S15.** Emission intensities of **L** (15  $\mu\text{M}$ ) as a function of externally added  $[\text{Al}^{3+}]$  in aqueous-methanol (1:4, v/v,  $\lambda_{\text{ex}}$ , 432 nm,  $\lambda_{\text{em}}$ , 545 nm for LOD determination (using fluorescence titration data of Fig.7)

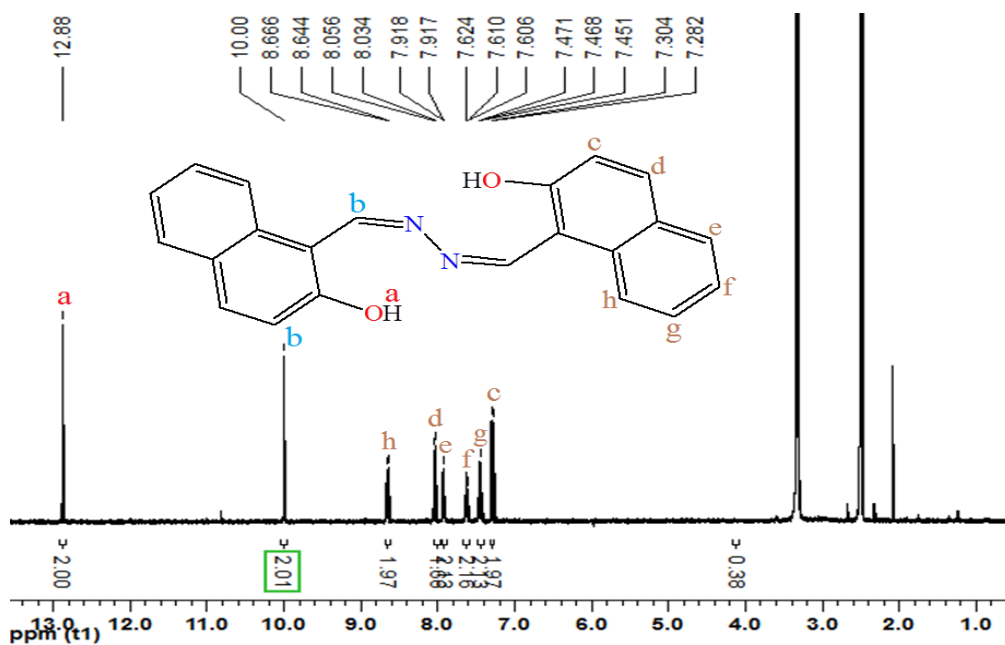

**Fig.S16.** <sup>1</sup>H NMR spectrum of **L** in DMSO-d<sub>6</sub>

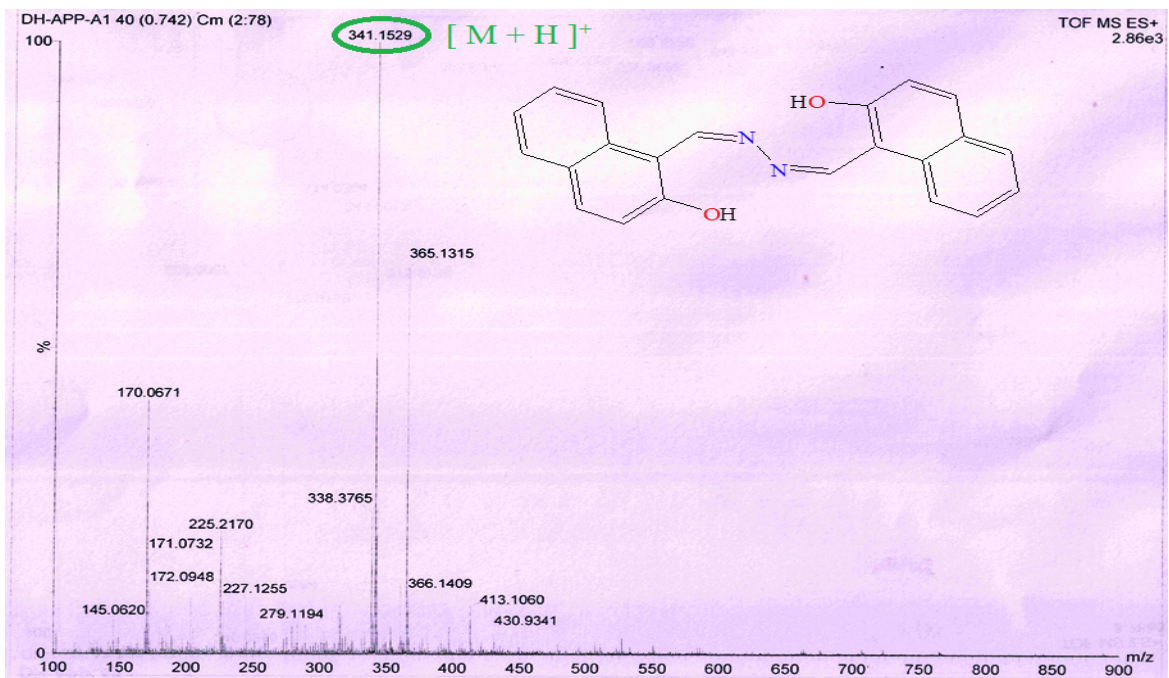

**Fig.S17.** QTOF-MS spectrum of **L**

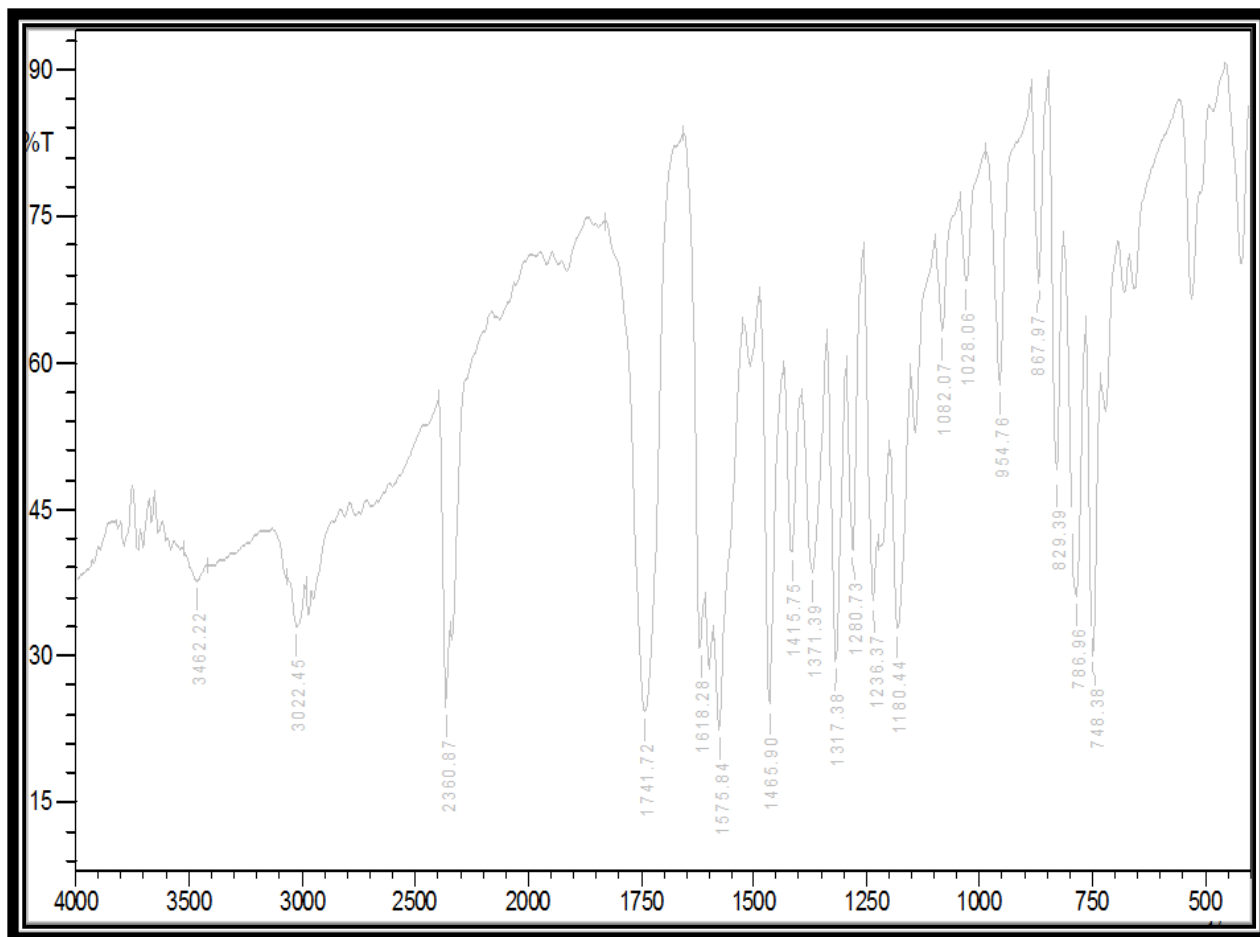

**Fig.S18.**FTIR spectrum of L

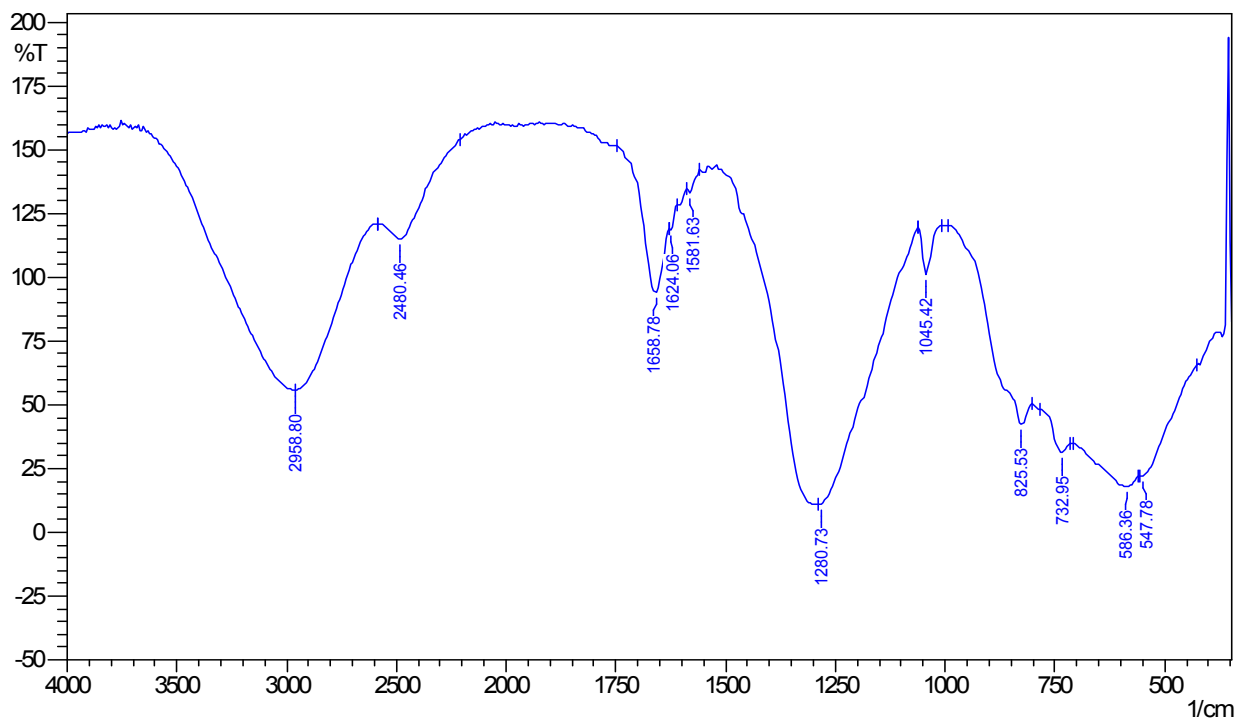

Fig.S19. FTIR spectrum of [L- Al<sup>3+</sup>] adduct

Table S1. Comparison of the present probe with the existing probe<sup>5</sup>

| Sensing parameters   |                  | Present probe                      | Reported probe <sup>5</sup> (S. Goswami et. al.) |
|----------------------|------------------|------------------------------------|--------------------------------------------------|
| Detection limits     | Acetate          | $1.0 \times 10^{-7}$ M             | $170 \times 10^{-7}$ M                           |
|                      | Al <sup>3+</sup> | $1.2 \times 10^{-7}$ M             | $15.4 \times 10^{-7}$ M                          |
| Binding constants    | Acetate          | $5.67 \times 10^4$ M <sup>-1</sup> | $3.2 \times 10^4$ M <sup>-1</sup>                |
|                      | Al <sup>3+</sup> | $5.25 \times 10^4$ M <sup>-1</sup> | $4.0 \times 10^4$ M <sup>-1</sup>                |
| Emission wavelengths | Acetate          | 621 nm                             | 486 nm                                           |
|                      | Al <sup>3+</sup> | 545 nm                             | 450 nm                                           |

## References

- (1) H. A. Benesi and J. H. Hildebrand, *J. Am. Chem. Soc.*, 1949, **71**, 2703-2707.
- (2) E. Austin, M. Gouterman, *Bioinorg. Chem.* 1978, **9**, 281-298.
- (3) W. H. Melhuish, *J. Phys. Chem.* 1961, **65**, 229-235.
- (4). R. Kubin and A. Fletcher, *J. Lumin.*, 1983, **27**, 455-462.
- (5) S. Goswami, A.K. Das, K. Aich, A. Manna, H.K. Fun and C.K. Quah, *Supramol. Chem.*, 2014, **26**, 94-104.
